# Supplementary material
Source: publisher site journal article supplement (https://www.spandidos-publications.com/4553/downloadSupplementary)

Figure S1. Prediction accuracy of the external data for the new model. CPP, correct predicted percentage; PCA, principal component analysis.

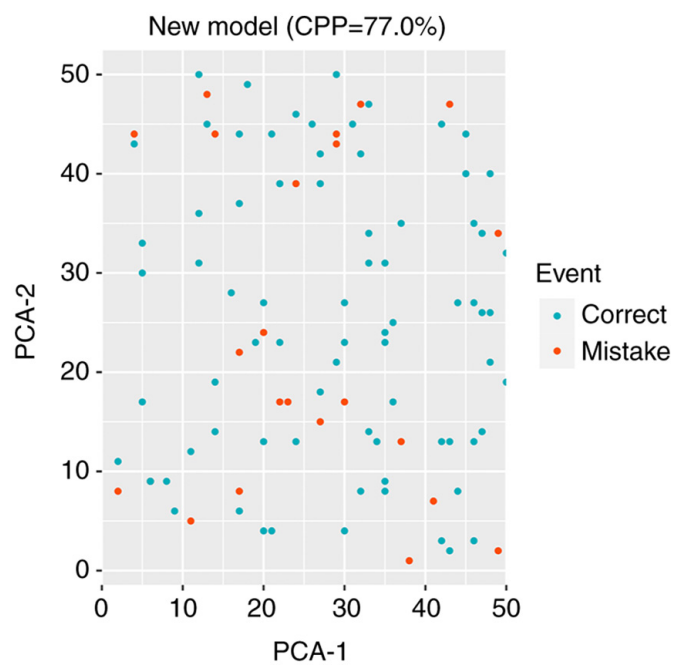

Supplement: Supplementary file 1 [file downloadSupplementary]
